# Supplementary material for: High-performance n-type Ta4SiTe4/polyvinylidene fluoride (PVDF)/graphdiyne organic–inorganic flexible thermoelectric composites
Source: Royal Society of Chemistry journal article supplement (doi:10.1039/d1ee02552j), 2021-01-01
Supplement: d1ee02552j1.pdf [file d1ee02552j1.pdf]

## Supporting Information

### High-performance n-type Ta<sub>4</sub>SiTe<sub>4</sub>/polyvinylidene fluoride (PVDF)/graphdiyne organic-inorganic flexible thermoelectric composites

Sanyin Qu<sup>1#</sup>, Chen Ming<sup>1#</sup>, Pengfei Qiu<sup>1,2\*</sup>, Kunqi Xu<sup>1</sup>, Qing Xu<sup>1,3</sup>, Qin Yao<sup>1</sup>, Ping Lu<sup>1</sup>, Huarong Zeng<sup>1</sup>, Xun Shi<sup>1,3\*</sup>, Lidong Chen<sup>1,3</sup>

#### Details about the $X_d$ calculation

The thickness of the fully depleted layer ( $X_d$ ) in the Ta<sub>4</sub>SiTe<sub>4</sub> and GDY interface can be calculated by the depletion approximation<sup>[1]</sup>

$$X_d = \left( \frac{2\varepsilon\Delta V}{qN_d} \right)^{1/2},$$

where  $\varepsilon$ ,  $\Delta V$ ,  $q$ , and  $N_d$  are the dielectric constant of Ta<sub>4</sub>SiTe<sub>4</sub>, the built-in potential in the interfacial area, the elementary charge, and the carrier concentration of Ta<sub>4</sub>SiTe<sub>4</sub>.  $\varepsilon$  is assumed to be  $10\varepsilon_0$  for Ta<sub>4</sub>SiTe<sub>4</sub>, where  $\varepsilon_0$  is permittivity of vacuum.  $\Delta V$  equals to the difference in work functions between Ta<sub>4</sub>SiTe<sub>4</sub> and GDY.

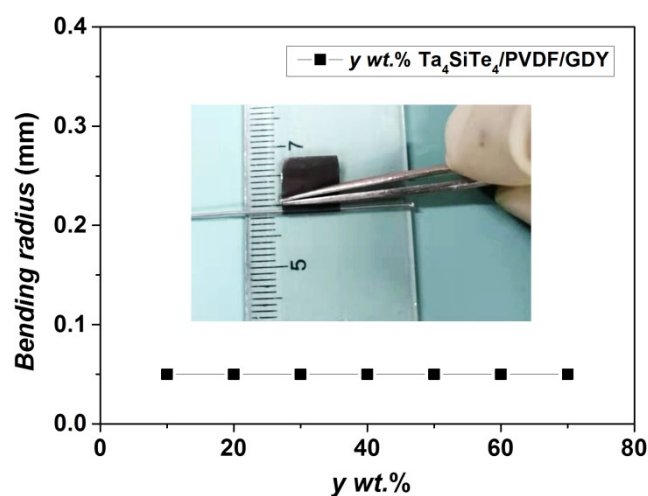

**Fig. S1** Bending radius for the  $y$  wt.%PVDF/Ta<sub>4</sub>SiTe<sub>4</sub>/5.8 wt.%GDY composite films with different Ta<sub>4</sub>SiTe<sub>4</sub> mass ratios. The inset shows the optical image of rolling the

composite film on a cylindrical object with  $r = 0.05$  mm. This method was proposed by Liang et al. [2]

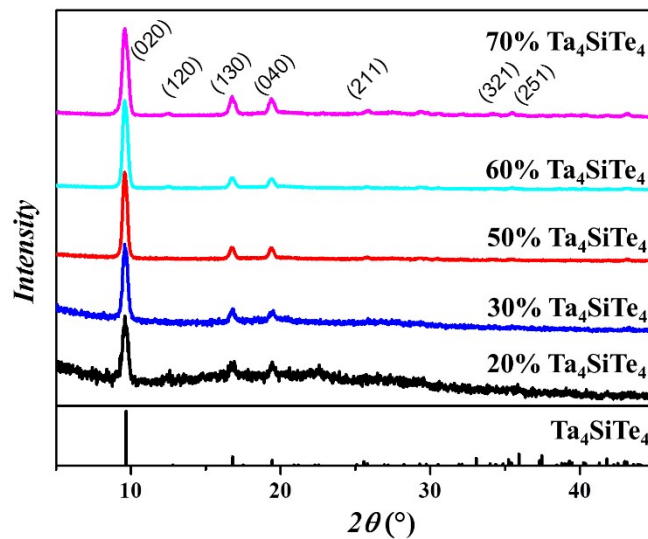

**Fig. S2** X-ray diffraction patterns of the  $y$  wt.%PVDF/Ta<sub>4</sub>SiTe<sub>4</sub>/5.8 wt.%GDY composite films with different Ta<sub>4</sub>SiTe<sub>4</sub> mass ratio.

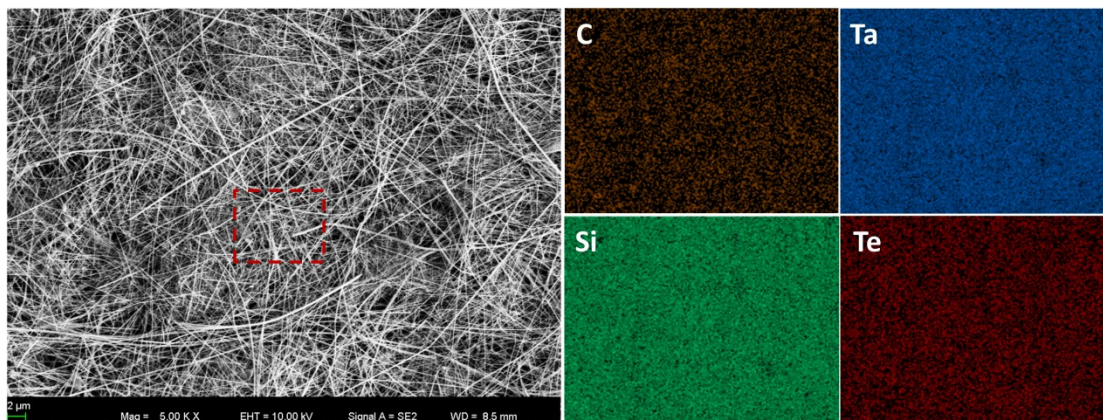

**Fig. S3** SEM image of 50 wt.%Ta<sub>4</sub>SiTe<sub>4</sub>/PVDF/5.8 wt.%GDY composite film and the elemental mapping of Ta, Si, Te, and C.

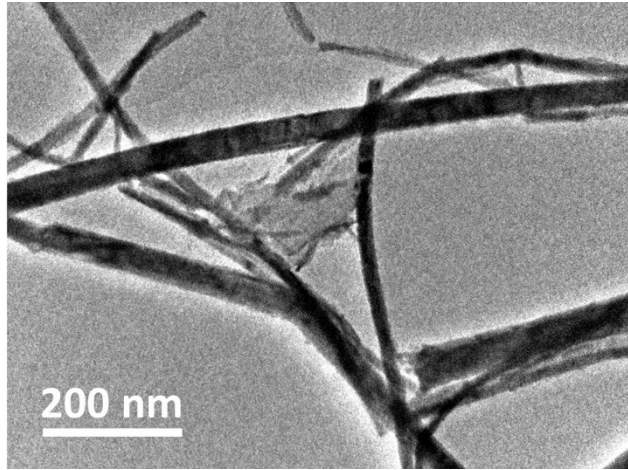

**Fig. S4** Low-resolution TEM images of Ta<sub>4</sub>SiTe<sub>4</sub>/GDY composites.

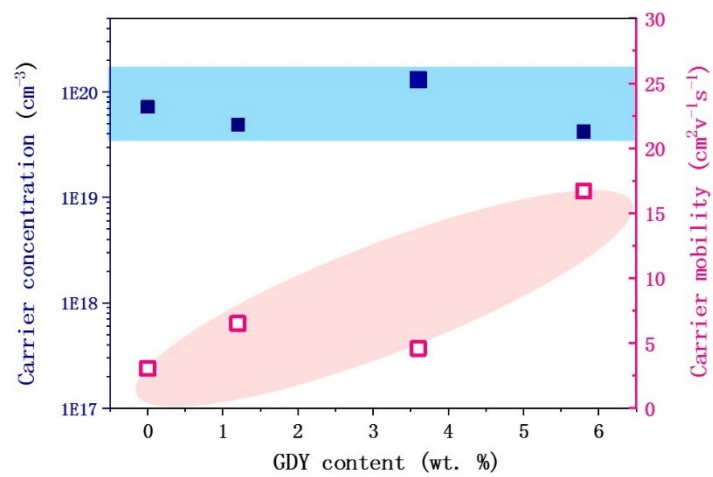

**Fig. S5** Carrier concentration and carrier mobility of 50 wt.%PVDF/Ta<sub>4</sub>SiTe<sub>4</sub>/*x* wt.%GDY (*x* = 0, 1.2, 3.6, and 5.8) composite films.

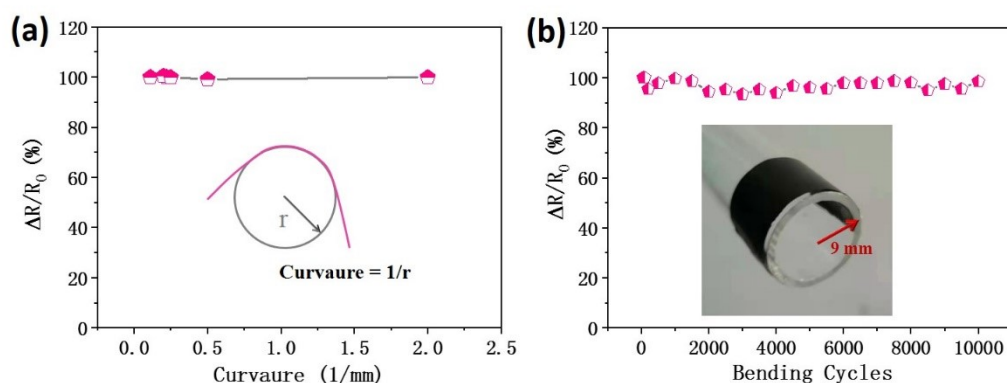

**Fig. S6** (a) Relative resistance variation ( $\Delta R/R_0$ ) as a function of various curvatures for 50 wt.% Ta<sub>4</sub>SiTe<sub>4</sub>/PVDF/5.8 wt.% GDY composite film. b)  $\Delta R/R_0$  as a function of bending cycles over a curvature of 0.11 mm<sup>-1</sup> for 50 wt.% Ta<sub>4</sub>SiTe<sub>4</sub>/PVDF/5.8 wt.% GDY composite film. The resistance is almost unchanged after 10000 bending cycles.

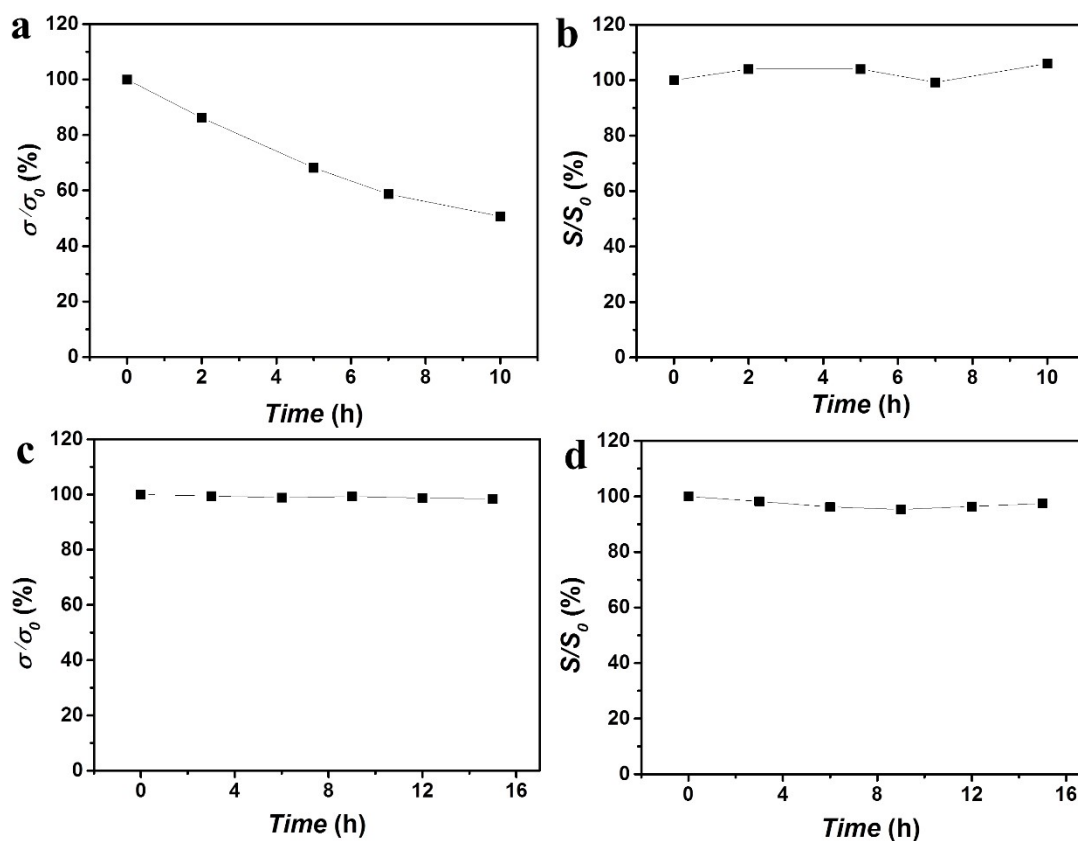

**Fig. S7** Electrical conductivity and Seebeck coefficient variations of 50 wt.%PVDF/Ta<sub>4</sub>SiTe<sub>4</sub>/5.8 wt.%GDY composite film during the stability test (a-b) in air and (c-d) Argon atmosphere.

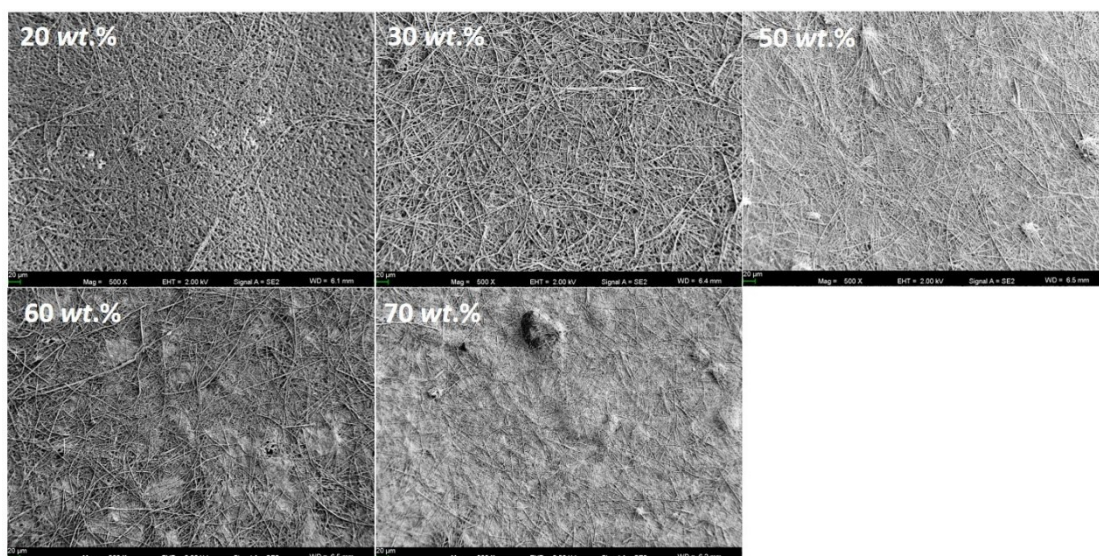

**Fig. S8** SEM images of  $y$  wt.% $\text{Ta}_4\text{SiTe}_4$ /PVDF/5.8 wt.%GDY ( $y = 20, 30, 50, 60,$  and  $70$ ) composite films.

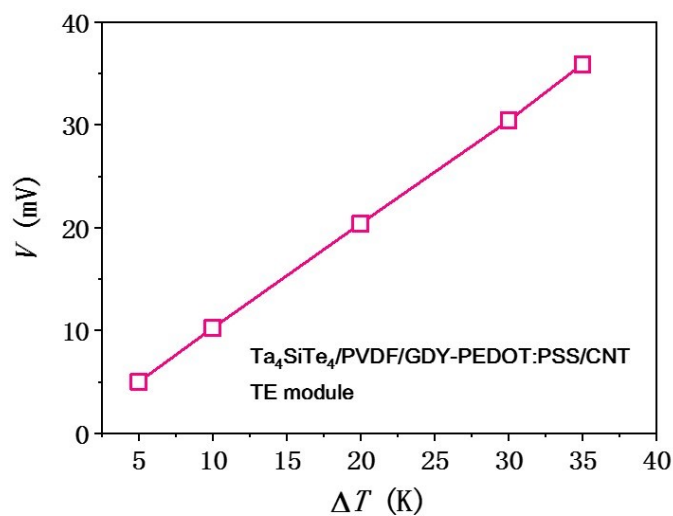

**Fig. S9** Open voltage ( $V$ ) as a function of temperature gradient ( $\Delta T$ ) for the prototype  $\text{Ta}_4\text{SiTe}_4$ /PVDF/GDY-PEDOT:PSS/CNT TE module.



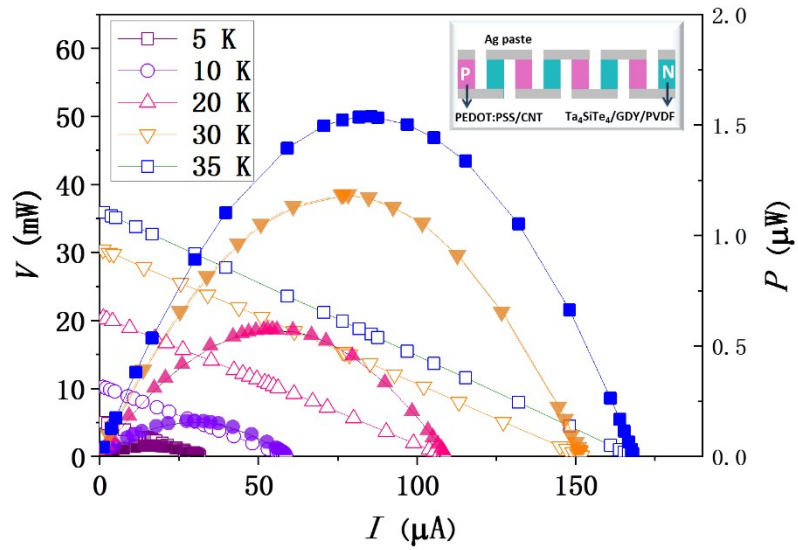

**Fig. S10** Output voltage ( $V$ ) and power ( $P$ ) as a function of current ( $I$ ) for prototype Ta<sub>4</sub>SiTe<sub>4</sub>/PVDF/GDY-PEDOT:PSS/CNT TE module under different operating temperatures. The inset shows the sketch map of the prototype module.

## References

- [1] D. A. Neamen, *Semiconductor Physics and Devices, Basic Principles*, New York: The McGraw-Hill Companies, Inc.
- [2] L. R. Liang, C. Y. Gao, G. M. Chen, C-Y Guo, *J. Mater. Chem. C*, 2016, **4**, 526.
